# Supplementary material for: Cluster and propensity based approximation of a network
Source: Springer Nature journal article supplement (doi:10.1186/1752-0509-7-21), 2013-01-01

**A. Gene clustering dendrogram**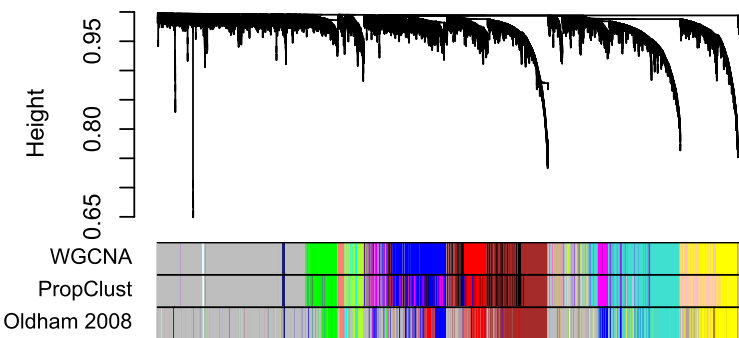**B. Inter-modular adj.**

cor=0.93, p=4.2e-60

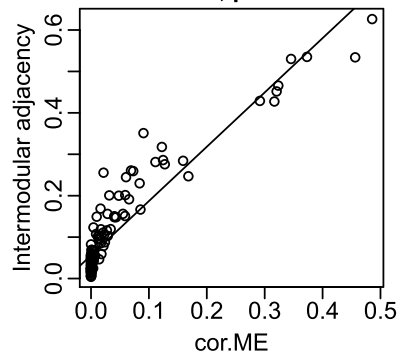**C. Module 1**

cor=1, p&lt;1e-200

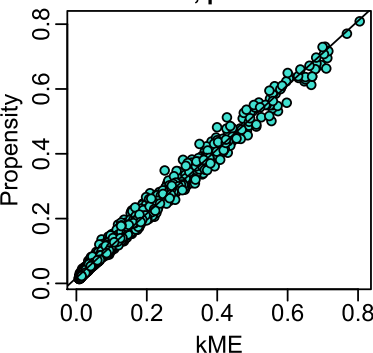**D. Module 2**

cor=0.96, p&lt;1e-200

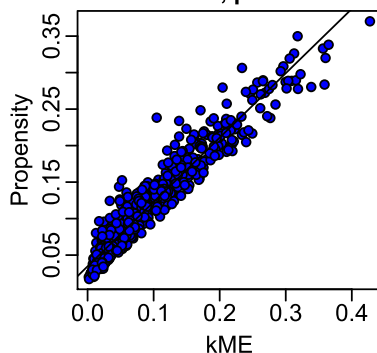**E. Module 3**

cor=0.99, p&lt;1e-200

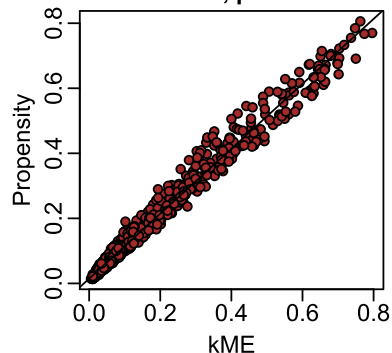**F. Correlation network topology**  
scale R<sup>2</sup>= 0.91 , slope= -3.05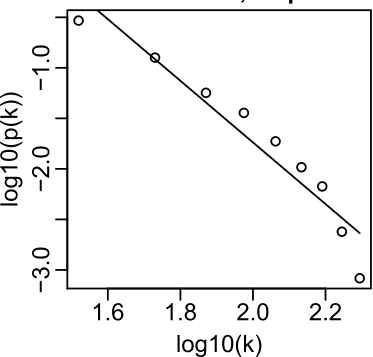**G. CPBA network topology**  
scale R<sup>2</sup>= 0.89 , slope= -2.96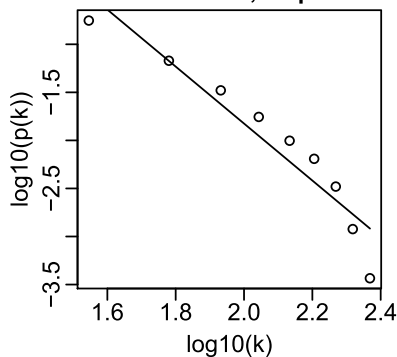**H. Propensity topology**  
scale R<sup>2</sup>= 0.95 , slope= -2.46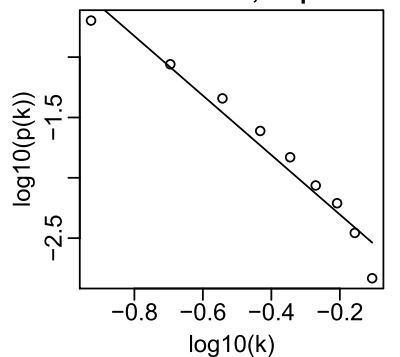**I. CPBA vs.**  
**Correlation connectivity**  
cor=0.96, p<1e-200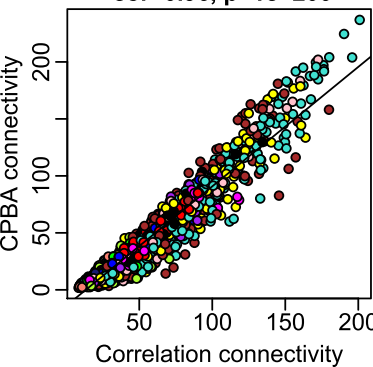**J. Propensity vs.**  
**Correlation connectivity**  
cor=0.88, p<1e-200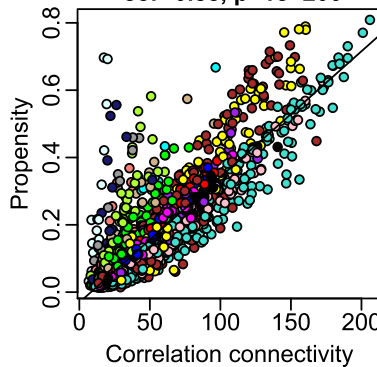**K. Propensity vs.**  
**CPBA connectivity**  
cor=0.93, p<1e-200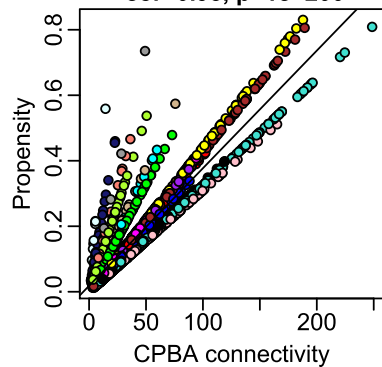

Supplement: 12918_2012_1088_MOESM3_ESM.pdf [file 12918_2012_1088_MOESM3_ESM.pdf]
